# Supplementary material for: Time of day as a critical variable in biology
Source: PubMed Central journal article supplement (PMC9202143; doi:10.1186/s12915-022-01333-z), 2022-06-15
Supplement: 12915_2022_1333_MOESM1_ESM.pdf [file 12915_2022_1333_MOESM1_ESM.pdf]

Summary Table 1.2

| Time of Day Reporting<br>Chi-Squared Analysis<br>Domain-by-Domain |      | Phase Reporting |              | Expected Values<br>(Row_sum*Column_Sum)<br>/Table_sum |              | Chi-Squared Terms<br>(O-E) <sup>2</sup> /E |              |                |            |                      |
|-------------------------------------------------------------------|------|-----------------|--------------|-------------------------------------------------------|--------------|--------------------------------------------|--------------|----------------|------------|----------------------|
| Domain                                                            | Year | Sufficient      | Insufficient | Sufficient                                            | Insufficient | Sufficient                                 | Insufficient | X <sup>2</sup> | P          | Different Reporting? |
| Behavioral Sciences                                               | 2015 | 12              | 38           | 10                                                    | 40           | 0.4                                        | 0.1          | 1              | 0.31731051 | No<br>p > 0.05       |
|                                                                   | 2019 | 8               | 42           | 10                                                    | 40           | 0.4                                        | 0.1          |                |            |                      |
| Biology                                                           | 2015 | 3               | 47           | 5                                                     | 45           | 0.8                                        | 0.08888889   | 1.77777778     | 0.18242244 | No<br>p > 0.05       |
|                                                                   | 2019 | 7               | 43           | 5                                                     | 45           | 0.8                                        | 0.08888889   |                |            |                      |
| Cardiac and Cardiovascular<br>Systems                             | 2015 | 0               | 50           | Chi-squared not possible, column with zeros           |              |                                            |              |                |            |                      |
|                                                                   | 2019 | 0               | 50           | Chi-squared not possible, column with zeros           |              |                                            |              |                |            |                      |
| Endocrinology and Metabolism                                      | 2015 | 1               | 49           | 4                                                     | 46           | 2.25                                       | 0.19565217   | 4.89130435     | 0.02699229 | * Yes<br>p < 0.05    |
|                                                                   | 2019 | 7               | 43           | 4                                                     | 46           | 2.25                                       | 0.19565217   |                |            |                      |
| Immunology                                                        | 2015 | 0               | 50           | Chi-squared not possible, column with zeros           |              |                                            |              |                |            |                      |
|                                                                   | 2019 | 0               | 50           | Chi-squared not possible, column with zeros           |              |                                            |              |                |            |                      |
| Neuroscience                                                      | 2015 | 6               | 44           | 7                                                     | 43           | 0.14285714                                 | 0.02325581   | 0.33222591     | 0.56435132 | No<br>p > 0.05       |
|                                                                   | 2019 | 8               | 42           | 7                                                     | 43           | 0.14285714                                 | 0.02325581   |                |            |                      |
| Oncology                                                          | 2015 | 0               | 50           | Chi-squared not possible, column with zeros           |              |                                            |              |                |            |                      |
|                                                                   | 2019 | 0               | 50           | Chi-squared not possible, column with zeros           |              |                                            |              |                |            |                      |
| Pharmacology and Pharmacy                                         | 2015 | 3               | 47           | 2                                                     | 48           | 0.5                                        | 0.02083333   | 1.04166667     | 0.30743417 | No<br>p > 0.05       |
|                                                                   | 2019 | 1               | 49           | 2                                                     | 48           | 0.5                                        | 0.02083333   |                |            |                      |
| Physiology                                                        | 2015 | 1               | 49           | 0.5                                                   | 49.5         | 0.5                                        | 0.00505051   | 1.01010101     | 0.31487864 | No<br>p > 0.05       |
|                                                                   | 2019 | 0               | 50           | 0.5                                                   | 49.5         | 0.5                                        | 0.00505051   |                |            |                      |
| Reproductive Biology                                              | 2015 | 1               | 49           | 2                                                     | 48           | 0.5                                        | 0.02083333   | 1.04166667     | 0.30743417 | No<br>p > 0.05       |
|                                                                   | 2019 | 3               | 47           | 2                                                     | 48           | 0.5                                        | 0.02083333   |                |            |                      |
|                                                                   |      |                 |              |                                                       |              |                                            |              |                |            |                      |
|                                                                   |      |                 |              |                                                       |              |                                            |              |                |            |                      |
| Time of Day Reporting<br>Chi-Squared Analysis<br>Domain-by-Domain |      | Phase Reporting |              | Expected Values<br>(Row_sum*Column_Sum)<br>/Table_sum |              | Chi-Squared Terms<br>(O-E) <sup>2</sup> /E |              |                |            |                      |
| Domain                                                            | Year | Sufficient      | Insufficient | Sufficient                                            | Insufficient | Sufficient                                 | Insufficient | X <sup>2</sup> | P          | Different Reporting? |
| Overall                                                           | 2015 | 27              | 473          | 30.5                                                  | 469.5        | 0.40163934                                 | 0.02609159   | 0.85546186     | 0.35501178 | No<br>p > 0.05       |
|                                                                   | 2019 | 34              | 466          | 30.5                                                  | 469.5        | 0.40163934                                 | 0.02609159   |                |            |                      |

Summary Table 1.3

| Light-Cycle Reporting<br>Chi-Squared Analysis<br>Domain-by-Domain |      | Phase Reporting |              | Expected Values<br>(Row_sum*Column_Sum)<br>/Table_sum |              | Chi-Squared Terms<br>(O-E) <sup>2</sup> /E |              |                |            |                      |
|-------------------------------------------------------------------|------|-----------------|--------------|-------------------------------------------------------|--------------|--------------------------------------------|--------------|----------------|------------|----------------------|
| Domain                                                            | Year | Sufficient      | Insufficient | Sufficient                                            | Insufficient | Sufficient                                 | Insufficient | X <sup>2</sup> | P          | Different Reporting? |
| Behavioral Sciences                                               | 2015 | 43              | 7            | 45                                                    | 5            | 0.08888889                                 | 0.8          | 1.77777778     | 0.18242244 | No                   |
|                                                                   | 2019 | 47              | 3            | 45                                                    | 5            | 0.08888889                                 | 0.8          |                |            | p > 0.05             |
| Biology                                                           | 2015 | 15              | 35           | 19.5                                                  | 30.5         | 1.03846154                                 | 0.66393443   | 3.40479193     | 0.06500731 | No                   |
|                                                                   | 2019 | 24              | 26           | 19.5                                                  | 30.5         | 1.03846154                                 | 0.66393443   |                |            | p > 0.05             |
| Cardiac and Cardiovascular<br>Systems                             | 2015 | 4               | 46           | 7                                                     | 43           | 1.28571429                                 | 0.20930233   | 2.99003322     | 0.08377845 | No                   |
|                                                                   | 2019 | 10              | 40           | 7                                                     | 43           | 1.28571429                                 | 0.20930233   |                |            | p > 0.05             |
| Endocrinology and Metabolism                                      | 2015 | 23              | 27           | 28                                                    | 22           | 0.89285714                                 | 1.13636364   | 4.05844156     | 0.04395104 | * Yes                |
|                                                                   | 2019 | 33              | 17           | 28                                                    | 22           | 0.89285714                                 | 1.13636364   |                |            | p < 0.05             |
| Immunology                                                        | 2015 | 3               | 47           | 4                                                     | 46           | 0.25                                       | 0.02173913   | 0.54347826     | 0.46099479 | No                   |
|                                                                   | 2019 | 5               | 45           | 4                                                     | 46           | 0.25                                       | 0.02173913   |                |            | p > 0.05             |
| Neuroscience                                                      | 2015 | 21              | 29           | 24                                                    | 26           | 0.375                                      | 0.34615385   | 1.44230769     | 0.22976627 | No                   |
|                                                                   | 2019 | 27              | 23           | 24                                                    | 26           | 0.375                                      | 0.34615385   |                |            | p > 0.05             |
| Oncology                                                          | 2015 | 0               | 50           | 0.5                                                   | 49.5         | 0.5                                        | 0.00505051   | 1.01010101     | 0.31487864 | No                   |
|                                                                   | 2019 | 1               | 49           | 0.5                                                   | 49.5         | 0.5                                        | 0.00505051   |                |            | p > 0.05             |
| Pharmacology                                                      | 2015 | 21              | 29           | 21.5                                                  | 28.5         | 0.01162791                                 | 0.00877193   | 0.04079967     | 0.8399251  | No                   |
|                                                                   | 2019 | 22              | 28           | 21.5                                                  | 28.5         | 0.01162791                                 | 0.00877193   |                |            | p > 0.05             |
| Physiology                                                        | 2015 | 23              | 27           | 19                                                    | 31           | 0.84210526                                 | 0.51612903   | 2.71646859     | 0.09931753 | No                   |
|                                                                   | 2019 | 15              | 35           | 19                                                    | 31           | 0.84210526                                 | 0.51612903   |                |            | p > 0.05             |
| Reproductive Biology                                              | 2015 | 12              | 38           | 12                                                    | 38           | 0                                          | 0            | 0              | 1          | No                   |
|                                                                   | 2019 | 12              | 38           | 12                                                    | 38           | 0                                          | 0            |                |            | p > 0.05             |
|                                                                   |      |                 |              |                                                       |              |                                            |              |                |            |                      |
|                                                                   |      |                 |              |                                                       |              |                                            |              |                |            |                      |
| Light-Cycle Reporting<br>Chi-Squared Analysis<br>Domain-by-Domain |      | Phase Reporting |              | Expected Values<br>(Row_sum*Column_Sum)<br>/Table_sum |              | Chi-Squared Terms<br>(O-E) <sup>2</sup> /E |              |                |            |                      |
| Domain                                                            | Year | Sufficient      | Insufficient | Sufficient                                            | Insufficient | Sufficient                                 | Insufficient | X <sup>2</sup> | P          | Different Reporting? |
| Overall                                                           | 2015 | 165             | 335          | 180.5                                                 | 319.5        | 1.33102493                                 | 0.75195618   | 4.16596222     | 0.04124398 | * Yes                |
|                                                                   | 2019 | 196             | 304          | 180.5                                                 | 319.5        | 1.33102493                                 | 0.75195618   |                |            | p < 0.05             |
