# Supplementary material for: Time of day as a critical variable in biology
Source: PubMed Central journal article supplement (PMC9202143; doi:10.1186/s12915-022-01333-z), 2022-06-15

**2015**

**A**

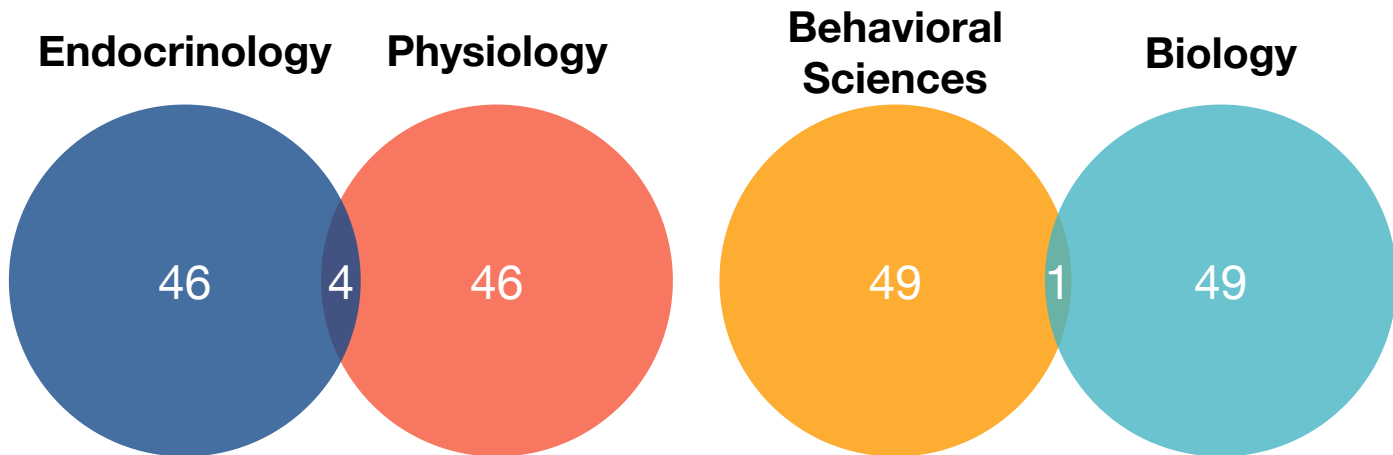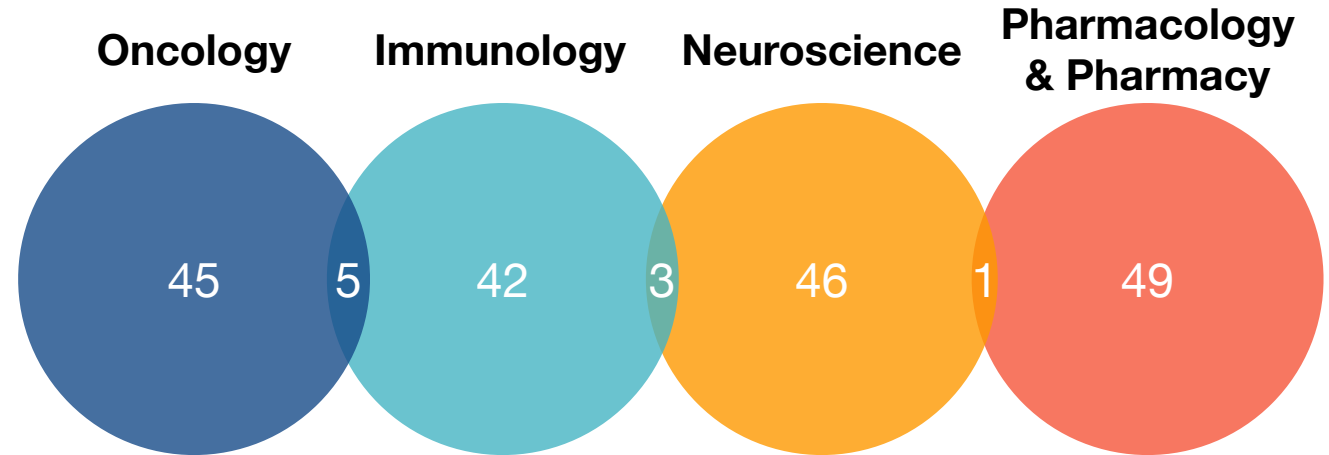

**2019**

**B**

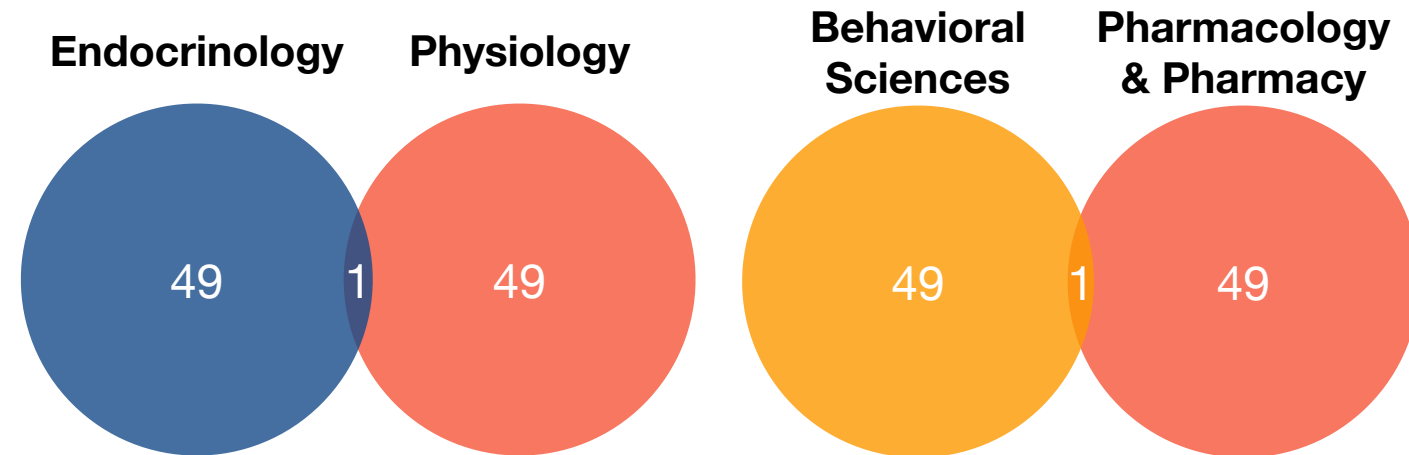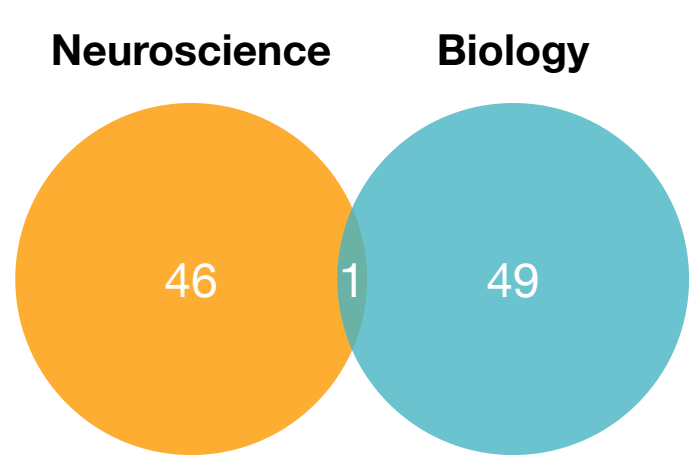

Supplement: 12915_2022_1333_MOESM2_ESM.pdf [file 12915_2022_1333_MOESM2_ESM.pdf]
